# Supplementary material for: Identification and analysis of RNA structural disruptions induced by single nucleotide variants using Riprap and RiboSNitchDB
Source: PubMed Central journal article supplement — NAR Genom Bioinform. 2020 Aug 14;2(3):lqaa057. doi: 10.1093/nargab/lqaa057 (PMC7671322; doi:10.1093/nargab/lqaa057), 2020-08-14
Supplement: lqaa057_supplemental_file.pdf [file lqaa057_supplemental_file.pdf]

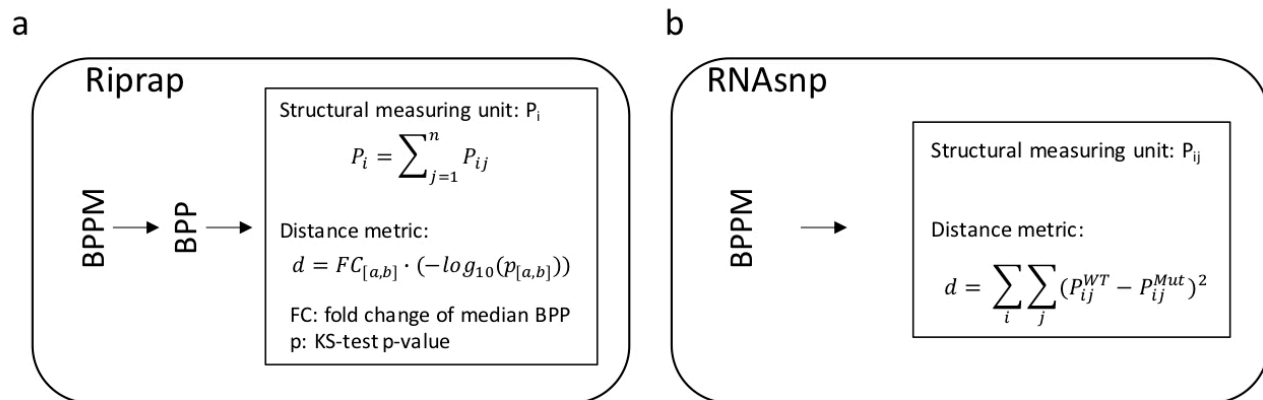

**Supplementary Figure 1. Diagram of Riprap and RNAsnp.** (a) Diagram, structural measuring unit and distance metric used in Riprap algorithm. Please see details in the Methods section. (b) Diagram, structural measuring unit and distance metric used in RNAsnp algorithm (3).

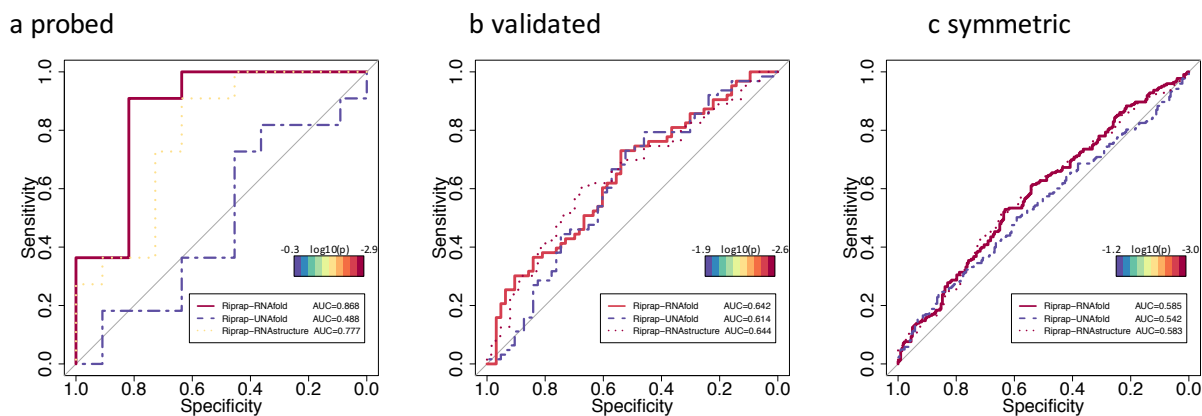

**Supplementary Figure 2. ROC analysis of Riprap-RNAfold, Riprap-UNAFold, and Riprap-RNAstructure on riboSNitch benchmarks.** (a) to (c) show the ROC curves for Riprap-RNAfold, Riprap-UNAFold and Riprap-RNAstructure applied to “probed”, “validated”, and “symmetric” datasets, respectively. The corresponding ROC curves for Riprap-RNAfold, Riprap-UNAFold and Riprap-RNAstructure are indicated by solid, dashed, and dotted lines, respectively.

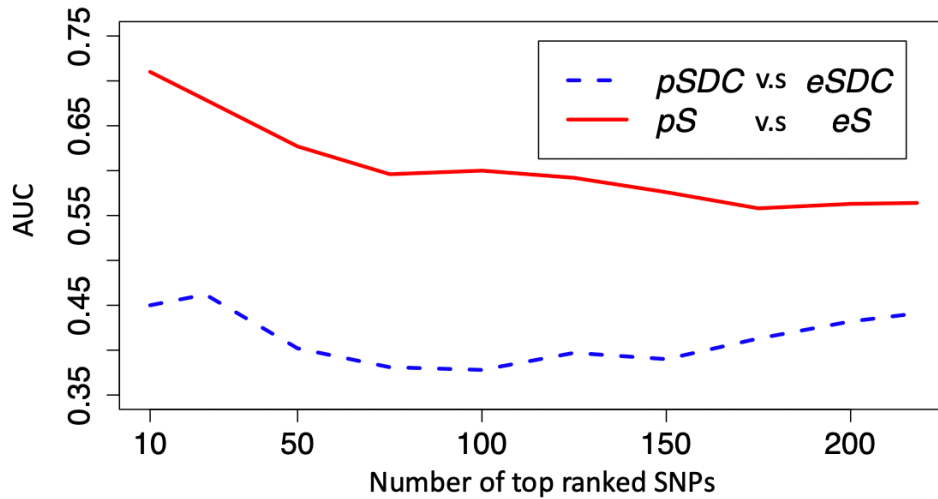

**Supplementary Figure 3. Comparisons between the local metric Riprap score  $S$  and the local SDC and assessments on SHAPE data.** AUC values of ROC analysis on the top and bottom  $n$  SNVs ranked by  $eSDC$  and  $eS$  scores, respectively. The red solid curve and blue dashed curve represent the AUCs of  $pSDC$  on  $eSDC$ , and  $pS$  on  $eS$ , respectively.

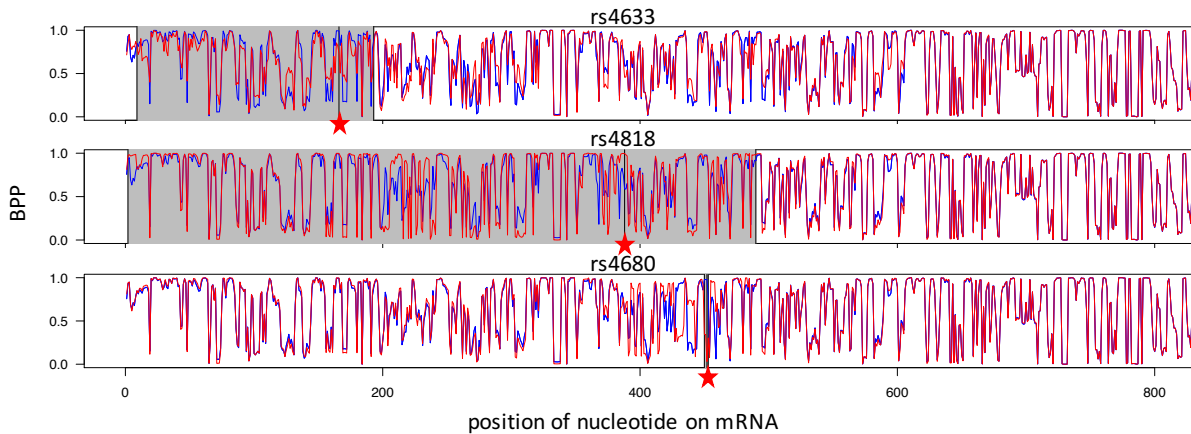

**Supplementary Figure 4. BPP curves of rs4633, rs4818, and rs4680 in S-COMT.** The X-axis represents the nucleotide position on the mRNA. The Y-axis represents the BPPs. The blue curve is for the WT RNA, while the red curve is for the mutant RNA. The SNV position is highlighted by a red star and a black vertical line. The finally selected region by Riprap is highlighted in grey. The three SNVs were studied in the Human COMT haplotypes (1).

**a**

RBP miRNA Methylation sites ClinVar

RBP binding sites

| Chromosome | Start     | End       | Strand | RBP name | CLIP Method        | Cell Line | Data source         | Score    |
|------------|-----------|-----------|--------|----------|--------------------|-----------|---------------------|----------|
| chr2       | 217070030 | 217070254 | +      | CSTF2T   | PAR-CLIP,PARalyzer | HEK293    | GSE37401,GSM917677  | 0.831945 |
| chr2       | 217070110 | 217070244 | +      | CSTF2    | PAR-CLIP,PARalyzer | HEK293    | GSE37401,GSM917676  | 0.777442 |
| chr2       | 217070111 | 217070291 | +      | ATXN2    | PAR-CLIP,PARalyzer | HEK293T   | DRA001158,DRS012390 | 0.989994 |
| chr2       | 217070130 | 217070319 | +      | TARDBP   | PAR-CLIP,PARalyzer | HEK293T   | DRA001158,DRS012387 | 0.906124 |
| chr2       | 217070196 | 217070244 | +      | CPSF7    | PAR-CLIP,PARalyzer | HEK293    | GSE37401,GSM917663  | 0.586511 |
| chr2       | 217070211 | 217070244 | +      | CPSF1    | PAR-CLIP,PARalyzer | HEK293    | GSE37401,GSM917672  | 0.596587 |
| chr2       | 217070211 | 217070301 | +      | HNRNPC   | PAR-CLIP,PARalyzer | HEK293T   | GSE56010,GSM1350199 | 0.739263 |
| chr2       | 217070212 | 217070253 | +      | FUS      | PAR-CLIP,PARalyzer | HEK293T   | DRA001158,DRS012384 | 0.965826 |
| chr2       | 217070214 | 217070245 | +      | HNRNPC   | PAR-CLIP,PARalyzer | HEK293T   | GSE56010,GSM1350200 | 0.62185  |
| chr2       | 217070216 | 217070291 | +      | HNRNPC   | PAR-CLIP,PARalyzer | HEK293T   | GSE56010,GSM1350201 | 0.712915 |

Showing 1 to 10 of 35 rows 10 rows per page

**b**

WT RNA sequence  
 TTACATACATGCTTTGAAGTTTCTGAAAAGTAGATCTTTTCTTGACCTAGTATATCAGTGACAGTTGCAGCCCTTGATGTGATTAGTGCTCATGTGGA

Mutant RNA sequence  
 TTACATACATGCTTTGAAGTTTCTGAAAAGTAGATCTTTTCTTGACCTAGCATAATCAGTGACAGTTGCAGCCCTTGATGTGATTAGTGCTCATGTGGA

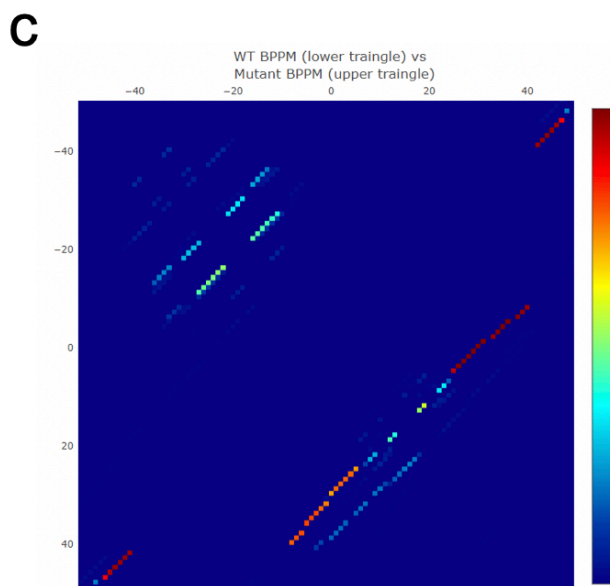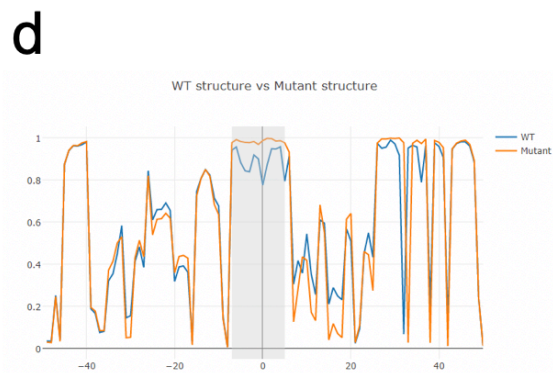

**Supplementary Figure 5. Example riboSNitch rs1051677 in riboSNitchDB.** (a) RBPs' binding peaks in the 201 nt region (100 nt upstream to 100 nt downstream) around the riboSNitch rs1051677. (b) The wild-type and mutant sequence of RNA. (c) BPPM heatmap of both the wild-type (upper triangle) and mutant RNA (lower triangle). (d) The BPP curve of both the wild-type (highlighted by blue) and mutant RNA (highlighted by orange).

**Supplementary Table 1. Threshold, accuracy, sensitivity, and specificity table.**

| Method                                      | Probed |      |      |      | Validated |      |      |      | Symmetric |      |      |      |
|---------------------------------------------|--------|------|------|------|-----------|------|------|------|-----------|------|------|------|
|                                             | T      | Acc  | Sn   | Sp   | T         | Acc  | Sn   | Sp   | T         | Acc  | Sn   | Sp   |
| Riprap                                      | 3.90   | 0.86 | 0.91 | 0.82 | 4.47      | 0.63 | 0.73 | 0.54 | 6.11      | 0.58 | 0.53 | 0.63 |
| Simple                                      | 2.13   | 0.73 | 0.73 | 0.73 | 2.24      | 0.60 | 0.59 | 0.62 | 2.63      | 0.57 | 0.49 | 0.65 |
| RNA <span>sn</span><br>p-value              | 0.39   | 0.77 | 0.82 | 0.73 | 0.30      | 0.61 | 0.48 | 0.75 | 0.47      | 0.57 | 0.56 | 0.59 |
| RNA <span>sn</span><br>p-value 0.05         | 0.05   | 0.50 | 0.00 | 1.00 | 0.05      | 0.52 | 0.13 | 0.92 | 0.05      | 0.52 | 0.09 | 0.95 |
| RNA <span>sn</span><br>dmax                 | 0.07   | 0.73 | 0.73 | 0.73 | 0.07      | 0.60 | 0.52 | 0.67 | 0.06      | 0.57 | 0.53 | 0.61 |
| classSNitch<br>**                           | 0.35   | 0.50 | 0.45 | 0.55 | 0.32      | 0.47 | 0.48 | 0.59 | 0.35      | 0.46 | 0.58 | 0.50 |
| remuRNA*                                    | 2.82   | #    | 0.64 | 0.82 | 1.65      | #    | 0.56 | 0.56 | 2.38      | #    | 0.45 | 0.64 |
| SNPfold*                                    | 0.92   | #    | 0.73 | 0.73 | 0.93      | #    | 0.60 | 0.60 | 0.93      | #    | 0.54 | 0.61 |
| Riprap <sup>^</sup>                         | -      | -    | -    | -    | 3.90      | 0.61 | 0.75 | 0.48 | 3.90      | 0.56 | 0.63 | 0.49 |
| Simple <sup>^</sup>                         | -      | -    | -    | -    | 2.13      | 0.60 | 0.60 | 0.59 | 2.13      | 0.55 | 0.54 | 0.57 |
| RNA <span>sn</span><br>p-value <sup>^</sup> | -      | -    | -    | -    | 0.39      | 0.57 | 0.49 | 0.65 | 0.39      | 0.57 | 0.49 | 0.64 |
| RNA <span>sn</span><br>dmax <sup>^</sup>    | -      | -    | -    | -    | 0.07      | 0.59 | 0.51 | 0.67 | 0.07      | 0.57 | 0.48 | 0.65 |
| classSNitch<br><sup>^</sup> **              | -      | -    | -    | -    | 0.37      | 0.49 | 0.33 | 0.65 | 0.37      | 0.48 | 0.38 | 0.58 |

T: Threshold; Acc: Accuracy; Sn: Sensitivity; Sp: Specificity.

\*The values for the methods were directly extracted from Corley *et al.* (2)

\*\*The lower performance may result from the fact that classSNitch was trained on the experimental SHAPE data instead of analysing BPP profiles.

# The values were not listed in Corley *et al.* (2)

<sup>^</sup> The threshold is determined based on the “Probed” riboSNitches, and the performance is evaluated on “Validated” and “Symmetric” riboSNitches.

**Supplementary Table 2. Commands to run the methods.**

| Method      | command                                                                                                                                                                 |
|-------------|-------------------------------------------------------------------------------------------------------------------------------------------------------------------------|
| RNAfold     | RNAfold -p < input.fa > seq.out                                                                                                                                         |
| RNAshp      | RNAshp -f input.fa -s snp_input.txt -w 100 -l 10 -c 0.0                                                                                                                 |
| classSNitch | R:<br>getFeatures(sample=mut,base=wt,trim=0,outfile = "out")<br>data("mutmap")<br>clf = classifyRNA(mutmap)<br>f = read.delim("out", header=F)<br>pred = predict(clf,f) |

**Supplementary Table 3. Annotation datasets of riboSNitchDB.**

| Annotation category                                      | Data sources                                                                                                                  | Data description                                                                     | The entire annotation dataset size                | Genomic annotation version |
|----------------------------------------------------------|-------------------------------------------------------------------------------------------------------------------------------|--------------------------------------------------------------------------------------|---------------------------------------------------|----------------------------|
| RBP binding sites                                        | POSTAR2 (4)<br>( <a href="http://lulab.life.tsinghua.edu.cn/postar/">http://lulab.life.tsinghua.edu.cn/postar/</a> )          | The RBP binding sites overlapping with the flanking region of riboSNitches.          | 31,186,943 RBP binding sites                      | hg19                       |
| miRNA targeting sites                                    | UCSC Table Browser (5)<br>( <a href="https://genome.ucsc.edu/cgi-bin/hgTables">https://genome.ucsc.edu/cgi-bin/hgTables</a> ) | The miRNA targeting sites around the positions of riboSNitches                       | 1,329,071 miRNA targeting sites                   | hg19                       |
| N6-methyladenosine (m <sup>6</sup> A) modification sites | m6AVar (6)<br>( <a href="http://m6avar.renlab.org/">http://m6avar.renlab.org/</a> )                                           | The N6-methyladenosine (m <sup>6</sup> A) modification sites around the riboSNitches | 301,529 m <sup>6</sup> A modification sites       | hg19                       |
| Clinical significance                                    | ClinVar (7)<br>( <a href="https://www.ncbi.nlm.nih.gov/clinvar/">https://www.ncbi.nlm.nih.gov/clinvar/</a> )                  | Clinical significance of the target SNVs                                             | 395,755 clinical significance records of the SNVs | hg19                       |

## Reference:

1. Nackley, A.G., Shabalina, S.A., Tchivileva, I.E., Satterfield, K., Korchynskyi, O., Makarov, S.S., Maixner, W. and Diatchenko, L. (2006) Human catechol-O-methyltransferase haplotypes modulate protein expression by altering mRNA secondary structure. *Science*, **314**, 1930-1933.
2. Corley, M., Solem, A., Qu, K., Chang, H.Y. and Laederach, A. (2015) Detecting riboSNitches with RNA folding algorithms: a genome-wide benchmark. *Nucleic Acids Res*, **43**, 1859-1868.
3. Sabarinathan, R., Tafer, H., Seemann, S.E., Hofacker, I.L., Stadler, P.F. and Gorodkin, J. (2013) The RNAsnp web server: predicting SNP effects on local RNA secondary structure. *Nucleic Acids Res*, **41**, W475-479.
4. Zhu, Y., Xu, G., Yang, Y.T., Xu, Z., Chen, X., Shi, B., Xie, D., Lu, Z.J. and Wang, P. (2019) POSTAR2: deciphering the post-transcriptional regulatory logics. *Nucleic Acids Res*, **47**, D203-D211.
5. Karolchik, D., Hinrichs, A.S., Furey, T.S., Roskin, K.M., Sugnet, C.W., Haussler, D. and Kent, W.J. (2004) The UCSC Table Browser data retrieval tool. *Nucleic Acids Res*, **32**, D493-496.
6. Zheng, Y., Nie, P., Peng, D., He, Z., Liu, M., Xie, Y., Miao, Y., Zuo, Z. and Ren, J. (2018) m6AVar: a database of functional variants involved in m6A modification. *Nucleic Acids Res*, **46**, D139-D145.
7. Landrum, M.J., Lee, J.M., Riley, G.R., Jang, W., Rubinstein, W.S., Church, D.M. and Maglott, D.R. (2014) ClinVar: public archive of relationships among sequence variation and human phenotype. *Nucleic Acids Res*, **42**, D980-985.
